# Supplementary material for: Circular RNAs in endometriosis analyzed through RNA sequencing and bioinformatics for expression profile
Source: PeerJ journal article supplement (doi:10.7717/peerj.19298), 2025-04-16
Supplement: MIQE_checklist.xls [file MIQE_checklist.xls]

## Sheet: Sheet1
ITEM TO CHECK	IMPORTANCE	CHECKLIST
EXPERIMENTAL DESIGN
Definition of experimental and control groups	E	Page No.4 Line101-110
Number within each group	E	Page No.4 Line101-110
Assay carried out by core lab or investigator's lab?	D
Acknowledgement of authors' contributions	D
SAMPLE
Description	E
Volume/mass of sample processed	D
Microdissection or macrodissection	E	Page No.4 Line101-110
Processing procedure	E
If frozen - how and how quickly?	E	Page No.4 Line101-110
If fixed - with what, how quickly?	E
Sample storage conditions and duration (especially for FFPE samples)	E
NUCLEIC ACID EXTRACTION
Procedure and/or instrumentation	E
Name of kit and details of any modifications	E	Line 181 and 183
Source of additional reagents used	D
Details of DNase or RNAse treatment	E	Line 178
Contamination assessment (DNA or RNA)	E	Line 179
Nucleic acid quantification	E	Line 179
Instrument and method	E	Line 179
Purity (A260/A280)	D
Yield	D
RNA integrity method/instrument	E	Line 128-129
RIN/RQI or Cq of 3' and 5' transcripts	E	Line 128-129
Electrophoresis traces	D
Inhibition testing (Cq dilutions, spike or other)	E	Line 128-129
REVERSE TRANSCRIPTION
Complete reaction conditions	E	Line 182-185
Amount of RNA and reaction volume	E	Line 182-185
Priming oligonucleotide (if using GSP) and concentration	E	Line 182-185
Reverse transcriptase and concentration	E	Line 182-185
Temperature and time	E	Line 182-185
Manufacturer of reagents and catalogue numbers	D
Cqs with and without RT	D*
Storage conditions of cDNA	D
qPCR TARGET INFORMATION
If multiplex, efficiency and LOD of each assay.	E	/
Sequence accession number	E	/
Location of amplicon	D
Amplicon length	E	/
In silico specificity screen (BLAST, etc)	E	/
Pseudogenes, retropseudogenes or other homologs?	D
Sequence alignment	D
Secondary structure analysis of amplicon	D
Location of each primer by exon or intron (if applicable)	E	/
What splice variants are targeted?	E	/
qPCR OLIGONUCLEOTIDES
Primer sequences	E	line 197
RTPrimerDB Identification Number	D
Probe sequences	D**
Location and identity of any modifications	E	line 197
Manufacturer of oligonucleotides	D
Purification method	D
qPCR PROTOCOL
Complete reaction conditions	E	line 187-192
Reaction volume and amount of cDNA/DNA	E	line 187-192
Primer, (probe), Mg++ and dNTP concentrations	E	line 187-192
Polymerase identity and concentration	E	line 187-192
Buffer/kit identity and manufacturer	E	line 186-192
Exact chemical constitution of the buffer	D
Additives (SYBR Green I, DMSO, etc.)	E	line 186-192
Manufacturer of plates/tubes and catalog number	D
Complete thermocycling parameters	E	line 186-192
Reaction setup (manual/robotic)	D
Manufacturer of qPCR instrument	E	line 186-192
qPCR VALIDATION
Evidence of optimisation (from gradients)	D
Specificity (gel, sequence, melt, or digest)	E	line 192-195
For SYBR Green I, Cq of the NTC	E	line 192-195
Standard curves with slope and y-intercept	E	/
PCR efficiency calculated from slope	E	/
Confidence interval for PCR efficiency or standard error	D
r2 of standard curve	E	/
Linear dynamic range	E	/
Cq variation at lower limit	E	/
Confidence intervals throughout range	D
Evidence for limit of detection	E	/
If multiplex, efficiency and LOD of each assay.	E	/
DATA ANALYSIS
qPCR analysis program (source, version)	E	line 192-195
Cq method determination	E	line 192-195
Outlier identification and disposition	E	/
Results of NTCs	E	line 192-195
Justification of number and choice of reference genes	E	line 192-195
Description of normalisation method	E	line 192-195
Number and concordance of biological replicates	D
Number and stage (RT or qPCR) of technical replicates	E	line 192-195
Repeatability (intra-assay variation)	E
Reproducibility (inter-assay variation, %CV)	D
Power analysis	D
Statistical methods for result significance	E	line 219-224
Software (source, version)	E	/
Cq or raw data submission using RDML	D
Table 1. MIQE checklist for authors, reviewers and editors. All essential information (E) must be submitted with the manuscript. Desirable
information (D) should be submitted if available. If using primers obtained from RTPrimerDB, information on qPCR target, oligonucleotides,
protocols and validation is available from that source.
*: Assessing the absence of DNA using a no RT assay is essential when first extracting RNA. Once the sample has been validated as
RDNA-free, inclusion of a no-RT control is desirable, but no longer essential.
**: Disclosure of the probe sequence is highly desirable and strongly encouraged. However, since not all commercial pre-designed assay
vendors provide this information, it cannot be an essential requirement. Use of such assays is advised against.
