# Supplementary material for: Circular RNAs in endometriosis analyzed through RNA sequencing and bioinformatics for expression profile
Source: PeerJ journal article supplement (doi:10.7717/peerj.19298), 2025-04-16
Supplement: qPCR_raw_data.xlsx [file qPCR_raw_data.xlsx]

## Sheet: Sheet2
Well	Sample Name	Target Name	Task	Reporter	Cт
A1	Control	actb	UNKNOWN	SYBR	19.67
A2	Control	actb	UNKNOWN	SYBR	19.88
A3	Control	actb	UNKNOWN	SYBR	19.25
A4	Endometriosis	actb	UNKNOWN	SYBR	19.64
A5	Endometriosis	actb	UNKNOWN	SYBR	19.33
A6	Endometriosis	actb	UNKNOWN	SYBR	19.52
A7	Control	actb	UNKNOWN	SYBR	19.95
A8	Control	actb	UNKNOWN	SYBR	19.87
A9	Control	actb	UNKNOWN	SYBR	19.7
A10	Endometriosis	actb	UNKNOWN	SYBR	19.9
A11	Endometriosis	actb	UNKNOWN	SYBR	19.53
A12	Endometriosis	actb	UNKNOWN	SYBR	19.82
B1	Control	actb	UNKNOWN	SYBR	19.82
B2	Control	actb	UNKNOWN	SYBR	19.79
B3	Control	actb	UNKNOWN	SYBR	19.8
B4	Endometriosis	actb	UNKNOWN	SYBR	19.89
B5	Endometriosis	actb	UNKNOWN	SYBR	19.61
B6	Endometriosis	actb	UNKNOWN	SYBR	19.88
B7	Control	actb	UNKNOWN	SYBR	19.71
B8	Control	actb	UNKNOWN	SYBR	19.92
B9	Control	actb	UNKNOWN	SYBR	19.71
B10	Endometriosis	actb	UNKNOWN	SYBR	19.71
B11	Endometriosis	actb	UNKNOWN	SYBR	19.61
B12	Endometriosis	actb	UNKNOWN	SYBR	19.55
C1	Control	actb	UNKNOWN	SYBR	19.8
C2	Control	actb	UNKNOWN	SYBR	19.66
C3	Control	actb	UNKNOWN	SYBR	19.72
C4	Endometriosis	actb	UNKNOWN	SYBR	19.77
C5	Endometriosis	actb	UNKNOWN	SYBR	19.62
C6	Endometriosis	actb	UNKNOWN	SYBR	19.72
C7	Control	actb	UNKNOWN	SYBR	19.65
C8	Control	actb	UNKNOWN	SYBR	19.83
C9	Control	actb	UNKNOWN	SYBR	19.65
C10	Endometriosis	actb	UNKNOWN	SYBR	19.98
C11	Endometriosis	actb	UNKNOWN	SYBR	19.66
C12	Endometriosis	actb	UNKNOWN	SYBR	19.64
D1	Control	hsa_circ_000005	UNKNOWN	SYBR	23.86
D2	Control	hsa_circ_000005	UNKNOWN	SYBR	23.12
D3	Control	hsa_circ_000005	UNKNOWN	SYBR	22.89
D4	Endometriosis	hsa_circ_000005	UNKNOWN	SYBR	20.83
D5	Endometriosis	hsa_circ_000005	UNKNOWN	SYBR	20.32
D6	Endometriosis	hsa_circ_000005	UNKNOWN	SYBR	20.48
D7	Control	hsa_circ_000002	UNKNOWN	SYBR	21.87
D8	Control	hsa_circ_000002	UNKNOWN	SYBR	22.9
D9	Control	hsa_circ_000002	UNKNOWN	SYBR	22.07
D10	Endometriosis	hsa_circ_000002	UNKNOWN	SYBR	19.58
D11	Endometriosis	hsa_circ_000002	UNKNOWN	SYBR	19.04
D12	Endometriosis	hsa_circ_000002	UNKNOWN	SYBR	19.12
E1	Control	hsa_circ_000016	UNKNOWN	SYBR	24.88
E2	Control	hsa_circ_000016	UNKNOWN	SYBR	24.06
E3	Control	hsa_circ_000016	UNKNOWN	SYBR	24.41
E4	Endometriosis	hsa_circ_000016	UNKNOWN	SYBR	21.81
E5	Endometriosis	hsa_circ_000016	UNKNOWN	SYBR	21.57
E6	Endometriosis	hsa_circ_000016	UNKNOWN	SYBR	21.6
E7	Control	hsa_circ_000011	UNKNOWN	SYBR	22.74
E8	Control	hsa_circ_000011	UNKNOWN	SYBR	22.67
E9	Control	hsa_circ_000011	UNKNOWN	SYBR	22.59
E10	Endometriosis	hsa_circ_000011	UNKNOWN	SYBR	25.74
E11	Endometriosis	hsa_circ_000011	UNKNOWN	SYBR	25.15
E12	Endometriosis	hsa_circ_000011	UNKNOWN	SYBR	24.58
F1	Control	hsa_circ_000010	UNKNOWN	SYBR	23.14
F2	Control	hsa_circ_000010	UNKNOWN	SYBR	23.18
F3	Control	hsa_circ_000010	UNKNOWN	SYBR	23.14
F4	Endometriosis	hsa_circ_000010	UNKNOWN	SYBR	26.34
F5	Endometriosis	hsa_circ_000010	UNKNOWN	SYBR	25.11
F6	Endometriosis	hsa_circ_000010	UNKNOWN	SYBR	24.76
F7	Control	hsa_circ_000021	UNKNOWN	SYBR	23.27
F8	Control	hsa_circ_000021	UNKNOWN	SYBR	23.63
F9	Control	hsa_circ_000021	UNKNOWN	SYBR	23.36
F10	Endometriosis	hsa_circ_000021	UNKNOWN	SYBR	25.37
F11	Endometriosis	hsa_circ_000021	UNKNOWN	SYBR	25.44
F12	Endometriosis	hsa_circ_000021	UNKNOWN	SYBR	26.34

## Sheet: Sheet1
		CT	CT	ΔCT	ΔΔCT	2^-ΔΔCT
hsa_circ_000005	Control	23.86	19.67	4.19	0.55	0.68302
		23.12	19.88	3.24	-0.4	1.31951
		22.89	19.25	3.64	0	1
	Endometriosis	20.83	19.64	1.19	-2.45	5.46416
		20.32	19.33	0.99	-2.65	6.27667
		20.48	19.52	0.96	-2.68	6.40856
hsa_circ_000002	Control	21.87	19.95	1.92	-0.45	1.36604
		22.9	19.87	3.03	0.66	0.632878
		22.07	19.7	2.37	0	1
	Endometriosis	19.58	19.9	-0.32	-2.69	6.45313
		19.04	19.53	-0.49	-2.86	7.26015
		19.12	19.82	-0.7	-3.07	8.39773
hsa_circ_000016	Control	24.88	19.82	5.06	0.45	0.732043
		24.06	19.79	4.27	-0.34	1.26576
		24.41	19.8	4.61	0	1
	Endometriosis	21.81	19.89	1.92	-2.69	6.45313
		21.57	19.61	1.96	-2.65	6.27667
		21.6	19.88	1.72	-2.89	7.4127
hsa_circ_000011	Control	22.74	19.71	3.03	0.15	0.90125
		22.67	19.92	2.75	-0.13	1.09429
		22.59	19.71	2.88	0	1
	Endometriosis	25.74	19.71	6.03	3.15	0.112656
		25.15	19.61	5.54	2.66	0.15822
		24.58	19.55	5.03	2.15	0.225313
hsa_circ_000010	Control	23.14	19.8	3.34	-0.08	1.05702
		23.18	19.66	3.52	0.1	0.933033
		23.14	19.72	3.42	0	1
	Endometriosis	26.34	19.77	6.57	3.15	0.112656
		25.11	19.62	5.49	2.07	0.238159
		24.76	19.72	5.04	1.62	0.325335
hsa_circ_000021	Control	23.27	19.65	3.62	-0.09	1.06437
		23.63	19.83	3.8	0.09	0.939523
		23.36	19.65	3.71	0	1
	Endometriosis	25.37	19.98	5.39	1.68	0.312083
		25.44	19.66	5.78	2.07	0.238159
		26.34	19.64	6.7	2.99	0.125869
